# Supplementary material for: Is Obstructive Sleep Apnoea Related to Neuropsychological Function in Healthy Older Adults? A Systematic Review and Meta-Analysis
Source: Springer Nature journal article supplement (doi:10.1007/s11065-017-9344-6), 2017-05-08
Supplement: MOESM6 [file 12272310]

| **Table S1. Risk of bias assessment** | | | | | | | | |  |
| --- | --- | --- | --- | --- | --- | --- | --- | --- | --- |
| **Study** | **Year** | **1** | **2** | **3** | **4** | **5** | **6** | **Risk of bias** | **Comments** |
| Yeasavage | 1985 |  |  |  |  | ? |  | High | Subjects were mix of clinical patients and research participants. |
| Berry | 1990 |  | ? |  |  | ? |  | High | Unclear whether OSA patients and controls were recruited from the same population, control subjects were chosen to match OSA patients on a range of demographics. |
| Ferini-Stambi | 2003 |  | ? | # |  |  |  | High | Unclear whether OSA patients and controls were recruited from the same population, although both groups had similar demographic characteristics. #No subject had AHI between 5-40. |
| Quan | 2006 |  |  |  |  |  |  | Low |  |
| Alchanatis | 2008 |  |  | # |  | ? |  | High | All subjects were from the same sleep clinic. #No subject had AHI between 7-30. |
| Mathieu | 2008 |  | ? | # |  |  |  | High | *Unclear whether OSA patients and controls were recruited from the same population. The comparator group had similar demographic characteristics. #No subject had an AHI between 5-20. |
| Sforza | 2010 |  |  |  |  |  |  | Low |  |
| Blackwell | 2011 |  |  |  |  |  |  | Low |  |
| Kim | 2011 |  |  |  |  |  |  | Low | Subjects were a convenience sample of patients who attended the one health clinic. |
| Yaffe | 2011 |  | † |  |  | ? |  | High | †Subjects were recruited from separate samples ~10years apart. All comparison groups had similar demographic characteristics. |
| Ju | 2012 |  | † |  |  |  |  | High | †Subjects were a mix of clinic patients and survey responders. All comparison groups had similar demographic characteristics. |
| Lutsey | 2015 |  |  |  |  |  |  | Low |  |
| Terpening | 2015 |  |  |  |  |  |  | High | Subjects were a convenience sample of healthy participants who responded to an advertisement. |

1. Was the study population clearly specified and defined?

2. Were all the subjects selected or recruited from the same or similar populations (including the same time period)? Were inclusion and exclusion criteria for being in the study prespecified and applied uniformly to all participants?

3. Did the study examine all levels of OSA as related to the outcome (e.g. categories of exposure, or exposure measured as continuous variable)?

4. Were the exposure measures (independent variables) clearly defined, valid, reliable, and implemented consistently across all study participants?

5. Were the outcome measures (dependent variables) clearly defined, valid, reliable, and implemented consistently across all study participants?

6. Were key potential confounding variables measured and adjusted statistically for their impact on the relationship between exposure(s) and outcome(s)?
